# Supplementary material for: Potent New Small-Molecule Inhibitor of Botulinum Neurotoxin Serotype A Endopeptidase Developed by Synthesis-Based Computer-Aided Molecular Design
Source: PLoS One. 2009 Nov 10;4(11):e7730. doi: 10.1371/journal.pone.0007730 (PMC2771286; doi:10.1371/journal.pone.0007730)
Supplement: Figure S1 — Synthesis toward Analog 2. (0.21 MB PDF) [file pone.0007730.s001.pdf]

Figure S1

Synthesis toward Analog 2

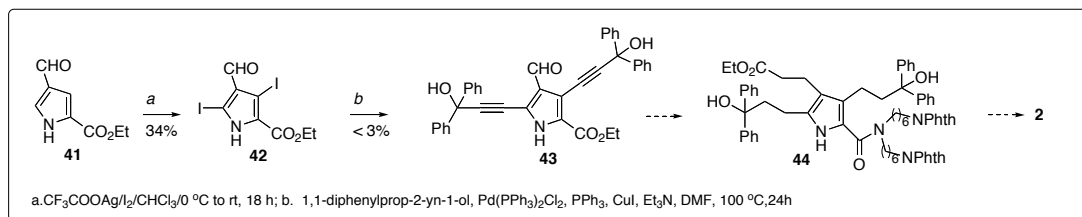

**Ethyl 4-formyl-3,5-diiodo-1H-pyrrole-2-carboxylate (42)**[1]. To a stirred solution of **41** [2] (0.70 g, 4.16 mmol) in  $\text{CHCl}_3$  (20 mL) at  $0\text{ }^\circ\text{C}$  was added  $\text{CF}_3\text{CO}_2\text{Ag}$  (2.75 g, 12.47 mmol) followed by  $\text{I}_2$  (1.58 g, 12.47 mmol). The resulting mixture was stirred for 18 hours in dark at room temperature. The reaction mixture was filtered through Celite and the filtrate was washed with saturated aqueous solution of  $\text{Na}_2\text{S}_2\text{O}_3$ . The organic layer was dried over anhydrous  $\text{MgSO}_4$ , filtered and concentrated *in vacuo*. MPLC purification ( $\text{CH}_2\text{Cl}_2$ : $\text{Et}_2\text{O}$ /95:5) of the residue gave **42** as a white solid (0.60 g, 34%).  $^1\text{H}$  NMR ( $\text{DMSO}-d_6$ )  $\delta$  13.58 (brs, 1H), 9.56 (s, 1H), 4.28 (q,  $J=7.2$  Hz, 2H), and 1.32 (t,  $J=7.2$  Hz, 3H).

**Ethyl 4-formyl-3,5-bis(3-hydroxy-3,3-diphenylprop-1-ynyl)-1H-pyrrole-2-carboxylate (43)**. A solution of **42** (0.05 g, 0.12 mmol), 1,1-diphenylprop-2-yn-1-ol (0.075 g, 0.36 mmol),  $\text{CuI}$  (0.005 g, 0.026 mmol),  $\text{Pd}(\text{PPh}_3)_2\text{Cl}_2$  (0.009 g, 0.0128 mmol),  $\text{PPh}_3$  (0.007 g, 0.027 mmol), and  $\text{Et}_3\text{N}$  (1 mL) in anhydrous  $\text{DMF}$  (1 mL) was stirred for 24 hours at  $100\text{ }^\circ\text{C}$  under  $\text{N}_2$  atmosphere. The reaction mixture was partitioned between water and  $\text{EtOAc}$ . The combined organic layer was dried over  $\text{MgSO}_4$ , filtered and concentrated *in vacuo*. MPLC purification (Hex: $\text{EtOAc}$ /20:80) of the residue gave **43** in less than 3% yield with inseparable impurities (see the attached  $^1\text{H}$  NMR spectrum).  $^1\text{H}$  NMR ( $\text{CDCl}_3$ )  $\delta$  10.25 (brs, 1H), 9.92 (s, 1H), 7.70-7.60 (m, 2H), 7.64-7.60 (m, 2H), 7.36-7.22 (m, 16H), 4.28 (q,  $J=7.2$  Hz, 2H), and 1.32 (t,  $J=7.2$  Hz, 3H).

## References

1. Farnier M, Fournari P (1973) Synthese d'iodoaldehydes Pyrroliques. Bulletin de la Societe Chimique de France: 351-356.
2. Elliott LD, Berry M, Orr-Ewing AJ, Booker-Milburn KI (2007) The Intramolecular Photometathesis of Pyrroles. Journal of the American Chemical Society 129: 3078-3079.

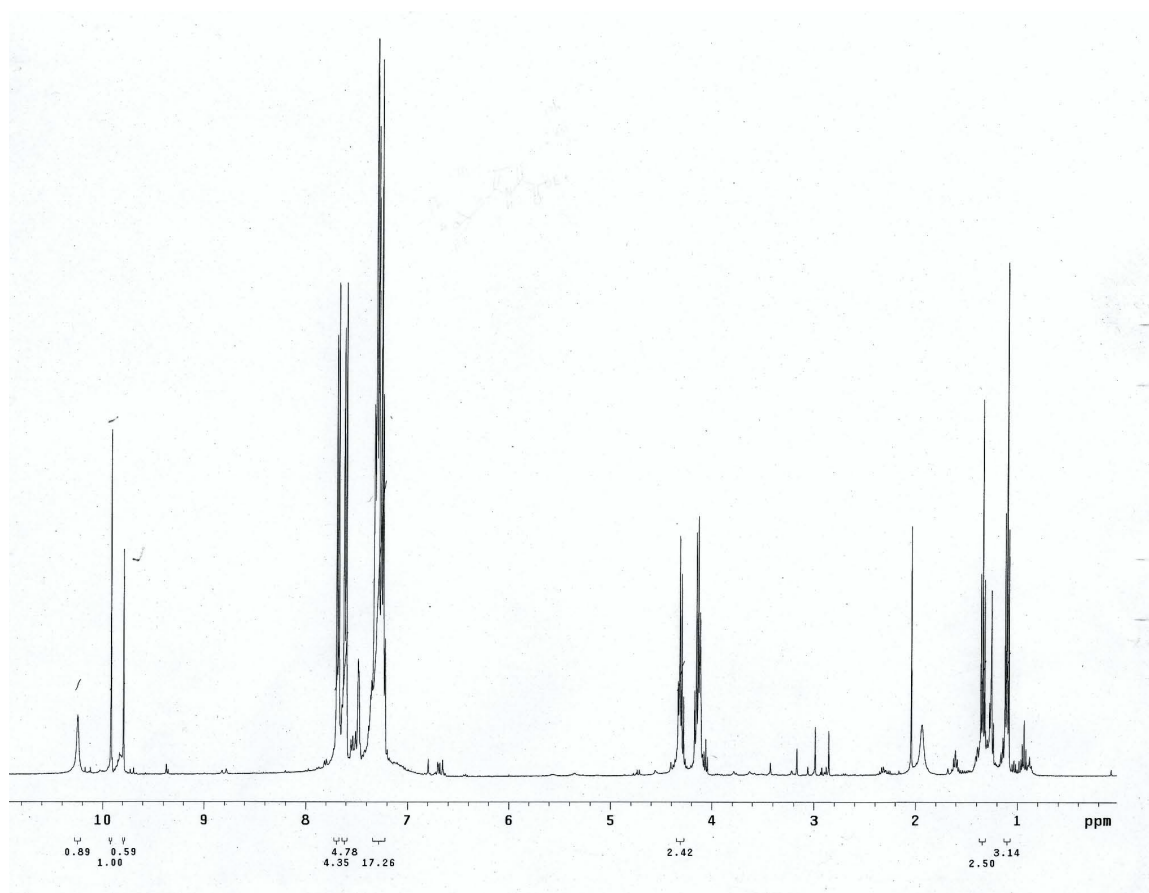

$^1\text{H}$  NMR Spectrum of Compound 43 with inseparable impurities
