# Supplementary material for: Potent New Small-Molecule Inhibitor of Botulinum Neurotoxin Serotype A Endopeptidase Developed by Synthesis-Based Computer-Aided Molecular Design
Source: PLOS journal article supplement (doi:10.1371/journal.pone.0007730), 2009-11-09
Supplement: S6 (10.1371/journal.pone.0007730.s006) [file journal.pone.0007730.s006]

Figure S6

Synthesis of Analog 7

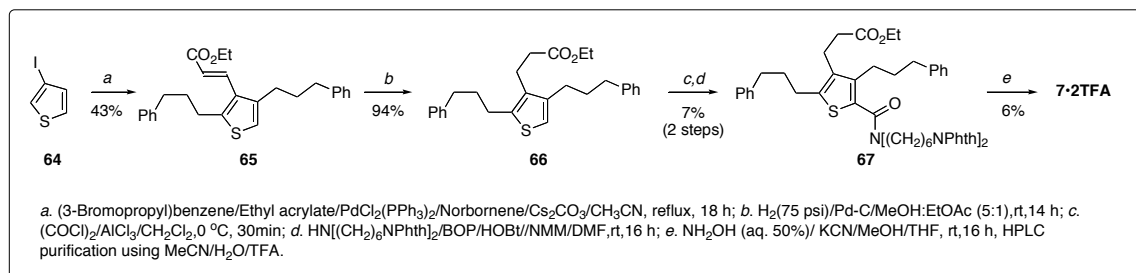

**Ethyl 3-(2,4-bis(3-phenylpropyl)thiophen-3-yl)propanoate (66).** The compound **65** was prepared following the literature method [1] with a slight modification; PdCl<sub>2</sub>(PPh<sub>3</sub>)<sub>2</sub> was used in place of Pd(OAc)<sub>2</sub>. This modification was necessary because Pd(OAc)<sub>2</sub> caused the conversion of 3-bromopropylbenzene, one of the key ingredients, to its acetate analog, resulting in not only difficulty in purification but also in lower yield. The compound **65** (124 mg, 2.96 × 10<sup>-4</sup> mol) was dissolved in EtOAc (1 mL) and diluted with MeOH (5 mL). The resulting solution was shaken in the presence of 10% Pd-C (0.20 g) using a Parr Hydrogenation Apparatus (Moline, IL) at 75 psi for 14 hours at room temperature. The catalyst was removed by filtration through Celite, the filtrate was concentrated *in vacuo* to give **66** (118 mg, 94%). This material was used without further purification. <sup>1</sup>H NMR (CDCl<sub>3</sub>) δ 7.30–7.16 (m, 10H), 6.74 (s, 1H), 4.13 (q, *J* = 7.1 Hz, 2H), 2.79–2.69 (m, 4H), 2.53 (t, *J* = 7.7 Hz, 2H), 2.37–2.33 (m, 2H), 2.00–1.92 (m, 4H), and 1.25 (t, *J* = 7.1 Hz, 3H).

**Ethyl 1-(bis(6-(1,3-dioxoisindolin-2-yl)hexyl)carbamoyl)-4-(3,5-bis(3-phenylpropyl)thiophen-3-yl)propanoate (67).** A carboxylic group was introduced into the thiophene ring of the compound **65** according to a known method[2], thus to an oven dried round bottom flask was charged with anhydrous CH<sub>2</sub>Cl<sub>2</sub> (1 mL), followed by AlCl<sub>3</sub> (7.6 mg, 5.71 × 10<sup>-5</sup> mol) under N<sub>2</sub> and then cooled to 0 °C, followed by oxalyl chloride (10 mL, 1.14 × 10<sup>-4</sup> mol). To this was

added a solution of **66** (24 mg,  $5.71 \times 10^{-5}$  mol) in anhydrous  $\text{CH}_2\text{Cl}_2$  (1 mL) over 30 min. The reaction was allowed to come to room temperature, quenched with  $\text{H}_2\text{O}$  (3 mL). The layers were separated and the aqueous layer was extracted with  $\text{CH}_2\text{Cl}_2$  ( $3 \times 3$  mL). The extracts were combined, dried over  $\text{MgSO}_4$ , and then filtered. To this filtrate **14x** (27 mg,  $5.71 \times 10^{-5}$  mol) was added, and then stirring was continued overnight. The solvent was removed *in vacuo*, the residue purified by MPLC to give **67** (4.1 mg, 7%) of the title compound.  $^1\text{H}$  NMR ( $\text{CDCl}_3$ )  $\delta$  7.83–7.82 (m, 4H), 7.71–7.69 (m, 4H), 7.26–7.13 (m, 10H), 4.12 (q,  $J = 7.1$  Hz, 2H), 3.67 (t,  $J = 7.1$  Hz, 2H), 3.58 (t,  $J = 7.1$  Hz, 2H), 3.38 (t,  $J = 7.5$  Hz, 2H), 3.16 (t,  $J = 7.7$  Hz, 2H), 2.92 (m, 2H), 2.81–2.67 (m, 6H), 2.28 (t,  $J = 8.1$  Hz, 2H), 1.98 (t,  $J = 7.5$  Hz, 2H), 1.82 (m, 2H), 1.69–1.57 (m, 8H), 1.40–1.34 (m, 6H), and 1.27–1.23 (m, 11H).

**N,N-Bis(6-aminohexyl)-4-(3-(hydroxyamino)-3-oxopropyl)-3,5-bis(3-phenylpropyl)thiophene-2-carboxamide (7)**. The compound obtained above (11.7 mg,  $1.27 \times 10^{-5}$  mol) was dissolved in  $\text{MeOH}:\text{THF}$  (0.5 mL each), followed by 50% aqueous  $\text{NH}_2\text{OH}$  (0.5 mL) and one crystal of KCN, and then at room temperature for 16 hours. The reaction was monitored by analytical HPLC (Phenomenex Gemini 4.6  $\times$  250 mm, 5  $\mu\text{m}$ , C18, linear gradient of 20% B to 100% B over 20 min, solvent A = 1000 mL  $\text{H}_2\text{O}$  and 1 mL TFA; solvent B = 900 mL  $\text{H}_2\text{O}$ , 100 mL MeCN, and 1 mL TFA), to give **7.2TFA** (0.74 mg, 6%).  $^1\text{H}$  NMR (400 MHz,  $\text{CD}_3\text{OD}$ )  $\delta$  7.28–7.16 (m, 10H), 3.44 (t,  $J = 7.3$  Hz, 2H), 3.25 (t,  $J = 7.6$  Hz, 2H), 3.13–2.98 (m, 2H), 2.96–2.90 (m, 4H), 2.79–2.69 (m, 8H), 2.16 (m, 2H), 1.98 (t,  $J = 7.1$  Hz, 2H), 1.82 (m, 2H), and 1.69–1.20 (m, 16H).

## References

1. Mitsudo K, Thansandote P, Wilhelm T, Mariampillai B, Lautens M (2006) Selectively Substituted Thiophenes and Indoles by a Tandem Palladium-Catalyzed Multicomponent Reaction. *Organic Letters* 8: 3939-3942.

2. Neubert ME, Fishel DE (1990) Preparation of 4-Alkyl-and 4-Halobenzoyl Chlorides: 4-Pentylbenzoyl Chloride. *Organic Syntheses Collective Volume 7*: 420.
